# Supplementary material for: Unraveling the separation mechanisms of the LTA zeolite depending on the regulated particle size and pore structure for efficient ethylene/ethane separation
Source: Royal Society of Chemistry journal article supplement (doi:10.1039/d3nj01217d), 2023-01-01
Supplement: d3nj01217d1.pdf [file d3nj01217d1.pdf]

## Supplementary Information

### Unraveling Separation Mechanisms of LTA Zeolite Depending on Regulated Particle Size and Pore Structure for Efficient Ethylene/Ethane Separation

Chaowen Liu, Mudi Xin<sup>†</sup>, Xuejing Zhang, Chunlu Wang, Limei Qiu, and  
Guangtong Xu\*

State Key Laboratory of Catalytic Materials and Reaction Engineering, SINOPEC  
Research Institute of Petroleum Processing Co., Ltd., Xueyuan Road 18, Beijing  
100083, China

\*Corresponding author: Prof. Guangtong Xu

<sup>†</sup>This author contributed equally to this work.

Address: SINOPEC Research Institute of Petroleum Processing Co., Ltd., Xueyuan  
Road 18, Beijing, China.

Tel: +86 010-82368613

E-mail: [xugt.ripp@sinopec.com](mailto:xugt.ripp@sinopec.com)

# 1 XRD patterns of LTA zeolites via different particle sizes and Ca exchange rate

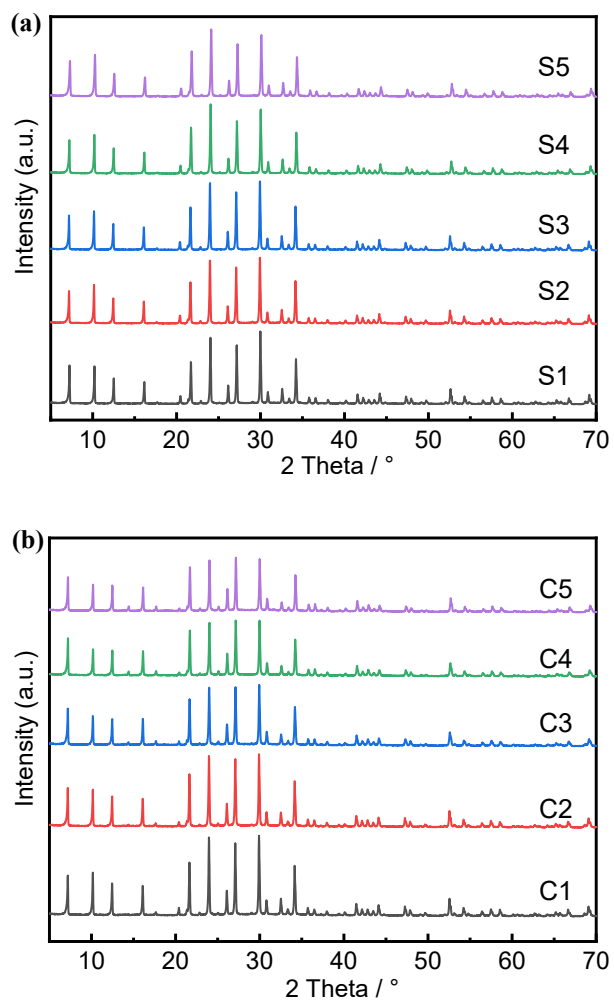

Fig. S1 XRD patterns of LTA zeolites via different particle sizes (a) and Ca exchange rate (b)

## 2 Dual-site Langmuir model for C<sub>2</sub>H<sub>4</sub> and C<sub>2</sub>H<sub>6</sub> adsorption isotherm fitting

The adsorption behaviors of C<sub>2</sub>H<sub>4</sub> and C<sub>2</sub>H<sub>6</sub> on the zeolites could be described from fitted adsorption isotherms by Dual-site Langmuir (DSL) equation:

$$q = \frac{q_{\text{sat},A} b_A p}{1 + b_A p} + \frac{q_{\text{sat},B} b_B p}{1 + b_B p}$$

wherein A and B represented two various adsorption sites,  $q_{\text{sat}}$  was saturation loading of adsorption sites,  $p$  was bulk gas phase pressure, and  $b$  was Langmuir coefficient.

Dual-site Langmuir parameter for adsorption of S1-S5 and C1-C5 as Table S1 and S2 showed.

Table S1 Dual-site Langmuir parameter for adsorption of S1-S5 and C1-C5

(C<sub>2</sub>H<sub>4</sub>,298K)

| Sample | $q_{\text{sat},A}$<br>(mmol/g) | $b_{\text{sat},A}$<br>(mbar <sup>-1</sup> ) | $q_{\text{sat},B}$<br>(mmol/g) | $b_{\text{sat},B}$<br>(mbar <sup>-1</sup> ) | R <sup>2</sup> |
|--------|--------------------------------|---------------------------------------------|--------------------------------|---------------------------------------------|----------------|
| S1     | 1.1676                         | 0.002901                                    | 2.6519                         | 0.178897                                    | 0.999          |
| S2     | 1.2036                         | 0.003829                                    | 2.5663                         | 0.292919                                    | 0.999          |
| S3     | 1.2299                         | 0.004050                                    | 2.5586                         | 0.339424                                    | 0.999          |
| S4     | 1.2469                         | 0.004921                                    | 2.3794                         | 0.349035                                    | 0.999          |
| S5     | 1.1468                         | 0.003398                                    | 2.5416                         | 0.263521                                    | 0.999          |
| C1     | 0.5207                         | 0.001578                                    | 2.6340                         | 0.059613                                    | 0.999          |
| C2     | 0.9985                         | 0.004630                                    | 2.2275                         | 0.091779                                    | 0.999          |
| C3     | 1.2294                         | 0.005021                                    | 2.0529                         | 0.164645                                    | 0.999          |
| C4     | 1.0375                         | 0.003087                                    | 2.3489                         | 0.139171                                    | 0.999          |
| C5     | 1.0180                         | 0.002870                                    | 2.3988                         | 0.149194                                    | 0.999          |

Table S2 Dual-site Langmuir parameter for adsorption of S1-S5 and C1-C5

(C<sub>2</sub>H<sub>6</sub>,298K)

| Sample | $q_{\text{sat,A}}$<br>(mmol/g) | $b_{\text{sat,A}}$<br>(mbar <sup>-1</sup> ) | $q_{\text{sat,B}}$<br>(mmol/g) | $b_{\text{sat,B}}$<br>(mbar <sup>-1</sup> ) | R <sup>2</sup> |
|--------|--------------------------------|---------------------------------------------|--------------------------------|---------------------------------------------|----------------|
| S1     | 2.0503                         | 0.004408                                    | 1.1827                         | 0.033904                                    | 0.999          |
| S2     | 1.8497                         | 0.004687                                    | 1.4117                         | 0.062496                                    | 0.999          |
| S3     | 1.8049                         | 0.004577                                    | 1.4682                         | 0.063362                                    | 0.999          |
| S4     | 1.8403                         | 0.004878                                    | 1.3113                         | 0.064303                                    | 0.999          |
| S5     | 1.8311                         | 0.004680                                    | 1.3155                         | 0.064722                                    | 0.999          |
| C1     | 1.1728                         | 0.007251                                    | 1.3724                         | 0.007252                                    | 0.999          |
| C2     | 2.2656                         | 0.007581                                    | 0.3718                         | 0.043617                                    | 0.999          |
| C3     | 0.7798                         | 0.109373                                    | 1.9858                         | 0.005990                                    | 0.999          |
| C4     | 1.7975                         | 0.005057                                    | 1.0569                         | 0.058858                                    | 0.999          |
| C5     | 1.3561                         | 0.003384                                    | 1.5569                         | 0.031608                                    | 0.999          |

### 3 Ideal adsorbed solution theory (IAST) calculation

The method of calculating selectivity was based on the premise that ethylene and ethane were at equal spreading pressure of the adsorbent material and used the pyIAST model<sup>1</sup> to calculate the molar percentages of ethylene and ethane on zeolite respectively. The IAST method was employed to evaluate the adsorption selectivity of modified zeolites for C<sub>2</sub>H<sub>4</sub>/C<sub>2</sub>H<sub>6</sub> by equation<sup>1</sup>:

$$\alpha_{C_2H_4/C_2H_6} = \frac{x_{C_2H_4}/y_{C_2H_4}}{x_{C_2H_6}/y_{C_2H_6}}$$

wherein  $x$  and  $y$  represented the mole fractions of the gas and adsorbed phases, respectively.

The spreading pressure and  $x_{C_2H_4}$  and  $x_{C_2H_6}$  of S1-S5 and C1-C5 were shown, respectively, in Table S3.

Table S3 IAST calculation of S1-S5 and C1-C5 ( $y(C_2H_4)/y(C_2H_6)=50/50, 1\text{bar}, 298\text{K}$ )

| Sample | spreading pressure | $x_{C_2H_4}$ | $x_{C_2H_6}$ | $\alpha_{C_2H_4/C_2H_6}$ |
|--------|--------------------|--------------|--------------|--------------------------|
| S1     | 13.27              | 3.06         | 0.26         | 11.71                    |
| S2     | 13.86              | 2.97         | 0.29         | 10.41                    |
| S3     | 14.41              | 3.05         | 0.30         | 10.29                    |
| S4     | 14.80              | 3.10         | 0.28         | 11.13                    |
| S5     | 14.12              | 2.99         | 0.27         | 11.14                    |
| C1     | 9.58               | 2.53         | 0.31         | 8.17                     |
| C2     | 10.10              | 2.56         | 0.31         | 8.25                     |
| C3     | 11.03              | 2.53         | 0.38         | 6.70                     |
| C4     | 11.35              | 2.59         | 0.36         | 7.24                     |
| C5     | 11.62              | 2.66         | 0.32         | 8.36                     |

## Reference

1. Simon, C.M.;Smit, B.andHaranczyk, M. pyIAST: Ideal adsorbed solution theory (IAST) Python package. *Comput. Phys. Commun.* **2016**, *200*, 364-380.
